# Supplementary material
Source: PubMed Central journal article supplement (PMC2912734)
Supplement: supp_85.8.728_Wielandeappendixes.pdf [file supp_85.8.728_Wielandeappendixes.pdf]

## Supplementary Online Content

Wieland ML, Beckman TJ, Cha SS, Beebe TJ, McDonald FS; Underserved Care Curriculum Collaborative. Resident physicians' knowledge of underserved patients: a multi-institutional survey. *Mayo Clin Proc.* 2010;85(8):728-733.

**eAPPENDIX 1.** Learner's Needs Assessment Survey

**eAPPENDIX 2.** Learner's Needs Assessment Responses

This supplementary material has been peer reviewed, edited, and approved by the authors.

## eAPPENDIX 1. Learner's Needs Assessment Survey

### LEARNER'S NEEDS ASSESSMENT

Your program director requests your feedback regarding your training needs and knowledge in the area of medically underserved populations. Medically underserved populations in this survey refers to groups in society that are traditionally less advantaged or have difficulty accessing the health care system (e.g., low income, low education, racial and ethnic minorities, and uninsured). The objective of the survey is to better understand the learning needs of resident physicians in order to facilitate curriculum planning in this area. Your participation is voluntary and results will remain confidential. Your program director will not receive any results linking responses to any individual.

#### INSTRUCTIONS

Thank you for assisting with this survey.

Please read each question carefully and mark the box that represents your best answer.

## SELF-ASSESSMENT

For each of the following topics, please indicate how knowledgeable you are. Also, please rate the level of importance each has to your medical education.

|                                                                                   | <u>Knowledge Level</u> |                        |                          | <u>Importance Level</u> |                       |                       |
|-----------------------------------------------------------------------------------|------------------------|------------------------|--------------------------|-------------------------|-----------------------|-----------------------|
|                                                                                   | Very knowledgeable     | Somewhat knowledgeable | Not at all knowledgeable | Very important          | Somewhat important    | Not at all important  |
| Health care availability (i.e., health care supply) for the medically underserved | <input type="radio"/>  | <input type="radio"/>  | <input type="radio"/>    | <input type="radio"/>   | <input type="radio"/> | <input type="radio"/> |
| Health care utilization (i.e., use of health care) by the medically underserved   | <input type="radio"/>  | <input type="radio"/>  | <input type="radio"/>    | <input type="radio"/>   | <input type="radio"/> | <input type="radio"/> |
| Access to health care for low income nations                                      | <input type="radio"/>  | <input type="radio"/>  | <input type="radio"/>    | <input type="radio"/>   | <input type="radio"/> | <input type="radio"/> |
| The relationship between insurance status and health outcomes in the U.S.         | <input type="radio"/>  | <input type="radio"/>  | <input type="radio"/>    | <input type="radio"/>   | <input type="radio"/> | <input type="radio"/> |
| Health care models that may enhance access to care                                | <input type="radio"/>  | <input type="radio"/>  | <input type="radio"/>    | <input type="radio"/>   | <input type="radio"/> | <input type="radio"/> |

For each of the following topics, please indicate how knowledgeable you are. Also, please rate the level of importance each has to your medical education.

|                                                                                                                                                                                                             | <u>Knowledge Level</u> |                        |                          | <u>Importance Level</u> |                       |                       |
|-------------------------------------------------------------------------------------------------------------------------------------------------------------------------------------------------------------|------------------------|------------------------|--------------------------|-------------------------|-----------------------|-----------------------|
|                                                                                                                                                                                                             | Very knowledgeable     | Somewhat knowledgeable | Not at all knowledgeable | Very important          | Somewhat important    | Not at all important  |
| The relationship between income and health                                                                                                                                                                  | <input type="radio"/>  | <input type="radio"/>  | <input type="radio"/>    | <input type="radio"/>   | <input type="radio"/> | <input type="radio"/> |
| The relationship between health literacy (the degree to which individuals can obtain, process, and understand basic health information and services needed to make appropriate health decisions) and health | <input type="radio"/>  | <input type="radio"/>  | <input type="radio"/>    | <input type="radio"/>   | <input type="radio"/> | <input type="radio"/> |
| The relationship between occupational level and health                                                                                                                                                      | <input type="radio"/>  | <input type="radio"/>  | <input type="radio"/>    | <input type="radio"/>   | <input type="radio"/> | <input type="radio"/> |
| Mechanisms for how socioeconomic position could impact health                                                                                                                                               | <input type="radio"/>  | <input type="radio"/>  | <input type="radio"/>    | <input type="radio"/>   | <input type="radio"/> | <input type="radio"/> |
| Environmental health and socioeconomic position                                                                                                                                                             | <input type="radio"/>  | <input type="radio"/>  | <input type="radio"/>    | <input type="radio"/>   | <input type="radio"/> | <input type="radio"/> |

For each of the following topics, please indicate how knowledgeable you are. Also, please rate the level of importance each has to your medical education.

|                                                                                                                 | <u>Knowledge Level</u> |                        |                          | <u>Importance Level</u> |                       |                       |
|-----------------------------------------------------------------------------------------------------------------|------------------------|------------------------|--------------------------|-------------------------|-----------------------|-----------------------|
|                                                                                                                 | Very knowledgeable     | Somewhat knowledgeable | Not at all knowledgeable | Very important          | Somewhat important    | Not at all important  |
| Health outcome discrepancies among different racial/ethnic groups in the U.S.                                   | <input type="radio"/>  | <input type="radio"/>  | <input type="radio"/>    | <input type="radio"/>   | <input type="radio"/> | <input type="radio"/> |
| Mechanisms for why racial and ethnic disparities exist                                                          | <input type="radio"/>  | <input type="radio"/>  | <input type="radio"/>    | <input type="radio"/>   | <input type="radio"/> | <input type="radio"/> |
| Racial stereotyping and medical decision making                                                                 | <input type="radio"/>  | <input type="radio"/>  | <input type="radio"/>    | <input type="radio"/>   | <input type="radio"/> | <input type="radio"/> |
| Language barriers in health systems                                                                             | <input type="radio"/>  | <input type="radio"/>  | <input type="radio"/>    | <input type="radio"/>   | <input type="radio"/> | <input type="radio"/> |
| Health equity (an inequity is an avoidable difference in health between more and less advantaged social groups) | <input type="radio"/>  | <input type="radio"/>  | <input type="radio"/>    | <input type="radio"/>   | <input type="radio"/> | <input type="radio"/> |

**ABOUT YOU****Are you male or female?**

- Male       Female

**What is your age?**

- 30 or younger     31 to 40     41 to 50     51 to 60     61 to 70     71 or older

**Are you any of the following?**

- Hispanic or Latino     Hmong     Somali     Vietnamese     None of the above

**Which of the following best describes you? (Mark all that apply.)**

- |                                                            |                                                        |
|------------------------------------------------------------|--------------------------------------------------------|
| <input type="checkbox"/> White or Caucasian                | <input type="checkbox"/> Asian or Pacific Islander     |
| <input type="checkbox"/> African American                  | <input type="checkbox"/> Other, please describe below: |
| <input type="checkbox"/> American Indian or Alaskan Native |                                                        |
-

**What was the approximate average annual income of your parents/guardians while you were growing up?**

- \$20,000 or less
- \$20,001 to \$30,000
- \$30,001 to \$40,000
- \$40,001 to \$50,000
- \$50,001 to \$60,000
- \$60,001 to \$70,000
- \$70,001 to \$80,000
- \$80,001 to \$90,000
- \$90,001 to \$100,000
- \$100,001 or more
- Don't know

**What is the highest level of education attained by either of your parents?**

- Did not finish high school
- High school diploma or equivalent (e.g., GED)
- Some college, but no degree
- Two year college degree or certificate
- Four year college degree
- Post college graduate or professional school
- Don't know



## KNOWLEDGE ASSESSMENT

Your answers to these questions will not be used to assess you individually. Rather they will help inform the need for future curricula. So please DO NOT look up or refer to reference material for any of the answers. Do not spend too much time on any one item, please just mark your choice for the answer to each question based on your current knowledge and understanding of the topic.

**What is the largest barrier to availability of health care in more developed countries?**

- Insufficient numbers of domestic health care practitioners being trained into the workforce
- Insufficient and fluctuating numbers of foreign health care practitioners
- Inadequate distribution of health care practitioners and services
- Inadequate reimbursement of health care practitioners and health services
- Don't know

**In the United States, which geographic setting has seen the most rapid growth of health care practitioners over the past twenty years?**

- Large cities
- Small cities
- Suburbs
- Small towns
- Rural areas
- Don't know



**What percent of American families who file for personal bankruptcy do so for medical reasons?**

- 10%
- 20%
- 30%
- 50%
- Don't know

**You suspect malignancy in one of your patients with chronic heartburn in your community clinic. You find out that they are recently uninsured and unable to pay for the endoscopy that you recommend. What is the most appropriate first step towards enhancing this patient's health care utilization?**

- Request transfer of care to an academic center or public facility, where there are more systems in place to enhance utilization among the uninsured
- Explore options within your health system to meet these needs
- Understanding cost prohibitions, you treat conservatively with medication and ensure close follow-up
- Refer the patient to the emergency department
- Don't know

**What is the primary health financing model in low income nations?**

- Private health insurance
- Government sponsored health plan
- Fee for service
- Managed care
- Employer-based health insurance
- Don't know

**Which intervention by itself is least likely to improve health care utilization in low-income countries?**

- Equity funds to enable poorest patients to be exempt from health care costs
- Abolition of user fees for health care
- Establishment of new clinics in resource poor areas
- Cash payment for use of health care services
- Don't know

**Which of the following is true regarding the uninsured population in the United States?**

- Programs to universally insure children (e.g., SCHIP) do not affect utilization of health care by these groups
- There is no significant difference between insured and uninsured populations in receiving recommended preventive services
- 12% of Americans are currently uninsured
- Being uninsured is associated with increased all-cause mortality
- The majority of the uninsured are also unemployed
- All of the above
- None of the above
- Don't know

**Which of the following racial/ethnic groups has the lowest rates of health insurance?**

- White or Caucasian
- American Indian or Alaska Native
- Asian
- African American
- Hispanic or Latino
- Native Hawaiian or other Pacific Islander
- Don't know

**You are contacted by the business office that your patient with diabetes, hypertension, and coronary artery disease has recently lost his health insurance. Which of the following is most likely regarding this patient?**

- He will likely continue to be uninsured until he is eligible for Medicare or Medicaid benefits
- If he were to regain health insurance a month later, his gap in coverage would label him as underinsured for the year
- A health savings account is unlikely to improve his long-term health care utilization
- A cost-sharing health insurance policy would improve his long-term health care utilization
- None of the above
- Don't know

**Which health care delivery system is the primary provider of "safety net" coverage to medically underserved populations in the United States?**

- Public, non-profit, and teaching hospitals and clinics
- Emergency departments
- Community health clinics
- Private physicians
- Don't know

**Which of the following statements is most accurate regarding population-level life expectancies?**

- The discrepancy in life expectancy between the countries with the highest and lowest life expectancies is 25 years
- The difference in life expectancy between the best off and worst off groups in America is 8 years
- Among more developed countries, the life expectancy correlates with Gross Domestic Product (GDP)
- Life expectancy within countries is directly associated with socioeconomic position
- Don't know

**You are about to see a patient with uncontrolled diabetes who has missed previous appointments and has been experiencing clinical decline. You read a social work note from one of his hospitalizations that describes significant financial stress at home. Which approach to this visit is most likely to positively affect health outcomes?**

- Elicit the patient's perspective of diabetes, and assess vulnerabilities and strengths
- Add medications to enhance glycemic control
- Reiterate the medical (and financial) consequences of uncontrolled diabetes
- Refer the patient to social services for financial assistance
- Don't know

**You practice in a community with significant socioeconomic diversity. Half of your patients have a high-school education, while the other half has a graduate/professional school education. What is a likely difference between these groups?**

- The higher-educated group is less likely to exercise regularly
- The higher-educated group is less likely to report a superior quality of life
- The higher-educated group is more likely to smoke
- The higher-educated group is likely to live longer
- All of the above
- None of the above
- Don't know

**Which group has the lowest health literacy and associated discrepancies in health outcomes?**

- Young adults (18 to 39)
- Middle-aged adults (40 to 64)
- Elderly (65 or older)
- Don't know



**The groundbreaking Whitehall studies examined health outcomes as they related to which measure of socioeconomic position?**

- Income
- Educational level
- Occupational class
- Social capital
- All of the above
- None of the above
- Don't know

**When taking a social history, you find out that your patient works on the production line at a local dairy processing plant. Which of the following is most likely to be correct?**

- Your patient is less likely to smoke than his plant manager
- All else being equal, your patient's all-cause mortality risk is higher than that of his plant manager
- Your patient's job is less physiologically and psychologically "stressful" than that of his plant manager
- Your patient is less likely to be exposed to physical, chemical, and biological hazards at the workplace than his plant manager
- Don't know

**Which of the following work environments is most likely to improve health outcomes among employees?**

- Low demand work load
- High demand work load
- High control over work environment
- High effort at work with low reward system
- Don't know

**Your patient is being discharged after treatment of a myocardial infarction. You recall that social support (emotional and informational support from family, friends, and colleagues) is independently associated with improved post-MI outcomes. Which patient group is most likely to enjoy these benefits of social support?**

- High-income male
- Low-income male
- High-income female
- Low-income female
- Don't know

**Which of the following is true regarding environmental health?**

- In the developing world, the most quantifiable environmental health risks are indoor air pollution and water pollution
- Socioeconomic position is not associated with environmental risk
- Outdoor air pollution affects all socioeconomic groups equally
- The "precautionary principle" states that all new chemical and biologic products should be tested for adverse health effects, and withdrawn from the market if adverse health effects are confirmed
- All of the above
- None of the above
- Don't know

**You are seeing a 29 year-old patient in your inner city clinic with obesity, impaired glucose tolerance, hyperlipidemia, and hypertension. Which realm of environmental health is likely to be contributing most to his health problems?**

- Air pollution
- Water pollution
- The built environment (e.g., housing, schools, workplace, green spaces)
- Hazardous waste
- None of the above
- Don't know

**Which of the following is true regarding health care disparities between African Americans and Whites in the United States?**

- There is no significant difference in referral rates for cardiac catheterization or coronary bypass surgery between White and African American patients
- African Americans receive more analgesia for cancer pain than Whites
- African Americans with end-stage kidney disease are less likely to be considered for a kidney transplant
- Quality of hospital care for treatment of pneumonia and congestive heart failure are no different for African American and White patients
- African Americans receive more curative surgery than Whites for non small-cell lung cancer
- All of the above
- None of the above
- Don't know

**Which of the following racial/ethnic groups has the lowest life expectancy among the U.S. population?**

- White or Caucasian
- American Indian or Alaska Native
- Asian
- African American
- Hispanic or Latino
- Native Hawaiian or other Pacific Islander
- Don't know

**In their 2002 publication, *Unequal Treatment*, which of the following did the Institute of Medicine conclude were primary root-causes for racial and ethnic healthcare disparities in the United States?**

- Healthcare disparities can largely be explained by the tendency of certain minority groups to refuse treatment
- Healthcare disparities can largely be explained by the increased health care needs of minority groups
- Healthcare disparities are inevitable realities of the health care system
- Healthcare disparities can largely be explained through bias, stereotyping, prejudice, and clinical uncertainty of providers and health systems
- All of the above
- None of the above
- Don't know

**You practice in an ethnically diverse community, and you note that African Americans are 28% more likely to die from cardiovascular disease, but they are far less likely to be referred for cardiac catheterizations. Which mechanism is likely to be the strongest contributor to this health care disparity?**

- Differences in disease severity between African Americans and Whites
- Geographic variations in type of hospital/health care facility
- Higher rates of refusal of care among African Americans
- Social isolation, segregation, and financial vulnerability
- Overuse of services by Whites
- Increased co-morbidities among African Americans
- Don't know



**According to major studies addressing this topic, which of the following is true regarding minority health care providers?**

- Individuals from minority groups prefer to obtain health care in an environment where they see minority health care providers
- Minority health care providers are less likely to practice in underserved areas
- Minorities are less likely to take part in a research study when research is conducted by a health care provider from the same minority group
- Minorities are represented at population levels among physicians
- All of the above
- None of the above
- Don't know

**During a first visit with a black patient, you notice that he is somewhat reluctant to pursue recommended testing. What is most likely regarding this patient's level of trust of the medical system?**

- All else being equal, he is less likely to trust the health care system than a similar White patient
- He represents an American populace that is reporting increased trust in the medical system over the past two decades
- He is likely concerned that he or a family member will be treated unfairly in the medical system because of this ethnicity
- He is likely to cite the Tuskegee syphilis study as the primary reason for his mistrust
- Don't know



**One of your patients, a Spanish-speaking immigrant, did not show up for his appointment with you. Which of the following practices is most likely to positively influence this patient's health care utilization?**

- Improve the services offered in specialty care practice to enhance quality of care to minority populations
- Hire trained medical interpreters to enhance the linguistic competency of the institution
- Conduct an afternoon workshop on cultural competency for health system staff
- Educate the health system staff on health-seeking behaviors of racial/ethnic minorities as a whole
- All of the above
- None of the above
- Don't know

**You practice in a diverse community where half of the population speaks little English. What is likely to be true regarding the health care of your non-English-speaking patients?**

- They will experience inferior quality of care
- They are more likely to seek care
- They are less likely to be admitted to the hospital from the emergency department
- They are more likely to be satisfied with their health care provider and institution than the English-speaking patients
- All of the above
- None of the above
- Don't know

**Which of the following is an example of a health inequity?**

- Increased prevalence of sickle cell disease among African Americans compared to Whites
- Increased prevalence of breast cancer among women compared to men
- Increased prevalence of myocardial infarction among lower income groups compared to higher income groups
- Increased prevalence of lung cancer in smokers compared to non-smokers
- All of above
- None of the above
- Don't know

**As a physician, you feel an obligation to promote initiatives that would positively influence the health of your community. Addressing which set of issues would likely be the strongest contribution to health equity?**

- Achieving universal access to health care
- Eliminating racial stereotyping among health care providers and health care systems
- Achieving more equal access to healthy food, housing, and environmental conditions
- Optimizing patient safety in health care systems
- Don't know

**THANK YOU!**

**Please submit the survey!**

# eAPPENDIX 2. Learner's Needs Assessment Responses

## Learner's Needs Assessment

n=498

1.

### Health care availability (i.e., health care supply) for the medically underserved

| Scale 1 - Knowledge Level |           |         |  |
|---------------------------|-----------|---------|--|
| Response                  | Frequency | Percent |  |
| Very knowledgeable        | 43        | 8.7%    |  |
| Somewhat knowledgeable    | 376       | 76.3%   |  |
| Not at all knowledgeable  | 74        | 15.0%   |  |

2.

### Health care utilization (i.e., use of health care) by the medically underserved

| Scale 1                  |           |         |  |
|--------------------------|-----------|---------|--|
| Response                 | Frequency | Percent |  |
| Very knowledgeable       | 43        | 8.7%    |  |
| Somewhat knowledgeable   | 353       | 71.5%   |  |
| Not at all knowledgeable | 98        | 19.8%   |  |

3.

### Access to health care for low income nations

| Scale 1                  |           |         |  |
|--------------------------|-----------|---------|--|
| Response                 | Frequency | Percent |  |
| Very knowledgeable       | 54        | 10.9%   |  |
| Somewhat knowledgeable   | 244       | 49.4%   |  |
| Not at all knowledgeable | 196       | 39.7%   |  |

4.

### The relationship between insurance status and health outcomes in the U.S.

| Scale 1                  |           |         |  |
|--------------------------|-----------|---------|--|
| Response                 | Frequency | Percent |  |
| Very knowledgeable       | 54        | 11.0%   |  |
| Somewhat knowledgeable   | 286       | 58.1%   |  |
| Not at all knowledgeable | 152       | 30.9%   |  |

5.

### Health care models that may enhance access to care

| Scale 1                  |           |         |  |
|--------------------------|-----------|---------|--|
| Response                 | Frequency | Percent |  |
| Very knowledgeable       | 32        | 6.5%    |  |
| Somewhat knowledgeable   | 265       | 54.0%   |  |
| Not at all knowledgeable | 194       | 39.5%   |  |

6.

### The relationship between income and health

| Scale 1 - Knowledge Level |           |         |  |
|---------------------------|-----------|---------|--|
| Response                  | Frequency | Percent |  |
| Very knowledgeable        | 103       | 21.0%   |  |
| Somewhat knowledgeable    | 357       | 72.7%   |  |
| Not at all knowledgeable  | 31        | 6.3%    |  |

7.

### The relationship between health literacy (the degree to which individuals can obtain, process, and understand basic health information and services needed to make appropriate health decisions) and health

| Scale 1                  |           |         |  |
|--------------------------|-----------|---------|--|
| Response                 | Frequency | Percent |  |
| Very knowledgeable       | 97        | 19.8%   |  |
| Somewhat knowledgeable   | 340       | 69.4%   |  |
| Not at all knowledgeable | 53        | 10.8%   |  |

8.

### The relationship between occupational level and health

| Scale 1                  |           |         |  |
|--------------------------|-----------|---------|--|
| Response                 | Frequency | Percent |  |
| Very knowledgeable       | 66        | 13.4%   |  |
| Somewhat knowledgeable   | 353       | 71.7%   |  |
| Not at all knowledgeable | 73        | 14.8%   |  |

## Learner's Needs Assessment

9.

### Mechanisms for how socioeconomic position could impact health

| Scale 1                  |           |         |                   |
|--------------------------|-----------|---------|-------------------|
| Response                 | Frequency | Percent | 0 20 40 60 80 100 |
| Very knowledgeable       | 89        | 18.2%   |                   |
| Somewhat knowledgeable   | 342       | 69.9%   |                   |
| Not at all knowledgeable | 58        | 11.9%   |                   |

10.

### Environmental health and socioeconomic position

| Scale 1                  |           |         |                   |
|--------------------------|-----------|---------|-------------------|
| Response                 | Frequency | Percent | 0 20 40 60 80 100 |
| Very knowledgeable       | 60        | 12.2%   |                   |
| Somewhat knowledgeable   | 330       | 67.3%   |                   |
| Not at all knowledgeable | 100       | 20.4%   |                   |

11.

### Health outcome discrepancies among different racial/ethnic groups in the U.S.

| Scale 1 - Knowledge Level |           |         |                   |
|---------------------------|-----------|---------|-------------------|
| Response                  | Frequency | Percent | 0 20 40 60 80 100 |
| Very knowledgeable        | 72        | 14.7%   |                   |
| Somewhat knowledgeable    | 352       | 71.8%   |                   |
| Not at all knowledgeable  | 66        | 13.5%   |                   |

12.

### Mechanisms for why racial and ethnic disparities exist

| Scale 1                  |           |         |                   |
|--------------------------|-----------|---------|-------------------|
| Response                 | Frequency | Percent | 0 20 40 60 80 100 |
| Very knowledgeable       | 54        | 11.1%   |                   |
| Somewhat knowledgeable   | 330       | 67.8%   |                   |
| Not at all knowledgeable | 103       | 21.1%   |                   |

13.

### Racial stereotyping and medical decision making

| Scale 1                  |           |         |                   |
|--------------------------|-----------|---------|-------------------|
| Response                 | Frequency | Percent | 0 20 40 60 80 100 |
| Very knowledgeable       | 54        | 11.1%   |                   |
| Somewhat knowledgeable   | 316       | 64.8%   |                   |
| Not at all knowledgeable | 118       | 24.2%   |                   |

14.

### Language barriers in health systems

| Scale 1                  |           |         |                   |
|--------------------------|-----------|---------|-------------------|
| Response                 | Frequency | Percent | 0 20 40 60 80 100 |
| Very knowledgeable       | 144       | 29.4%   |                   |
| Somewhat knowledgeable   | 308       | 63.0%   |                   |
| Not at all knowledgeable | 37        | 7.6%    |                   |

15.

### Health equity (an inequity is an avoidable difference in health between more and less advantaged social groups)

| Scale 1                  |           |         |                   |
|--------------------------|-----------|---------|-------------------|
| Response                 | Frequency | Percent | 0 20 40 60 80 100 |
| Very knowledgeable       | 61        | 12.5%   |                   |
| Somewhat knowledgeable   | 343       | 70.3%   |                   |
| Not at all knowledgeable | 84        | 17.2%   |                   |

16.

### Are you male or female?

| Response | Frequency | Percent | 0 20 40 60 80 100 |
|----------|-----------|---------|-------------------|
| Male     | 257       | 54.0%   |                   |
| Female   | 219       | 46.0%   |                   |

17

### What is your age?

| Response      | Frequency | Percent | 0 20 40 60 80 100 |
|---------------|-----------|---------|-------------------|
| 30 or younger | 364       | 74.0%   |                   |
| 31 to 40      | 123       | 25.0%   |                   |
| 41 to 50      | 3         | 0.6%    |                   |
| 51 to 60      | 1         | 0.2%    |                   |
| 61 to 70      | 1         | 0.2%    |                   |
| 71 or older   | 0         | 0.0%    |                   |

## Learner's Needs Assessment

18.

Are you any of the following?

| Response           | Frequency | Percent | 0 | 20 | 40 | 60 | 80 | 100 |
|--------------------|-----------|---------|---|----|----|----|----|-----|
| Hispanic or Latino | 35        | 7.3%    |   |    |    |    |    |     |
| Hmong              | 1         | 0.2%    |   |    |    |    |    |     |
| Somali             | 1         | 0.2%    |   |    |    |    |    |     |
| Vietnamese         | 1         | 0.2%    |   |    |    |    |    |     |
| None of the above  | 443       | 92.1%   |   |    |    |    |    |     |

19.

Which of the following best describes you? (Mark all that apply.)

| Scale 1                           |           |         | 0 | 20 | 40 | 60 | 80 | 100 |
|-----------------------------------|-----------|---------|---|----|----|----|----|-----|
| Response                          | Frequency | Percent |   |    |    |    |    |     |
| White or Caucasian                | 358       | 73.2%   |   |    |    |    |    |     |
| African American                  | 19        | 3.9%    |   |    |    |    |    |     |
| American Indian or Alaskan Native | 4         | 0.8%    |   |    |    |    |    |     |
| Asian or Pacific Islander         | 71        | 14.5%   |   |    |    |    |    |     |
| Other, please describe below:     | 51        | 10.4%   |   |    |    |    |    |     |

- Pakistani
- Asian Indian
- middle eastern
- arabic
- Indian
- Pakistani (genetically)
- African
- latino
- hispanic
- Indian
- black, caribbean
- Asian Indian
- Latin American
- Indian
- Latin American/Hispani
- American
- white and latino
- Italian, Mexican, 1st
- Mexican American
- hispanic
- African
- Latin american
- Bad ass mofo
- middle eastern
- Puerto Rican
- Indian (as in India, n
- Cuban
- hispanic
- Middle eastern
- Egyptian
- middle eastern
- latino
- Southeast Asian
- Hispanic
- Asian Indian
- Black and White
- Latino
- Middle eastern
- Latina
- Indian Subcontinent (h
- Afro-Caribbean
- Meditteranean
- South Asian
- Pakistani, brown skin
- Indian
- Asian - middle eastern
- arab
- asian american
- Latin American
- 50% Caucasian, 50% His
- hispanic
- Nigerian American
- Latin
- white canadian/black c
- middle eastern;arab

## Learner's Needs Assessment

20

**What was the approximate average annual income of your parents/guardians while you were growing up?**

| Response              | Frequency | Percent | 0 | 20 | 40 | 60 | 80 | 100 |
|-----------------------|-----------|---------|---|----|----|----|----|-----|
| \$20,000 or less      | 27        | 5.5%    |   |    |    |    |    |     |
| \$20,001 to \$30,000  | 31        | 6.3%    |   |    |    |    |    |     |
| \$30,001 to \$40,000  | 41        | 8.4%    |   |    |    |    |    |     |
| \$40,001 to \$50,000  | 45        | 9.2%    |   |    |    |    |    |     |
| \$50,001 to \$60,000  | 40        | 8.2%    |   |    |    |    |    |     |
| \$60,001 to \$70,000  | 39        | 8.0%    |   |    |    |    |    |     |
| \$70,001 to \$80,000  | 46        | 9.4%    |   |    |    |    |    |     |
| \$80,001 to \$90,000  | 31        | 6.3%    |   |    |    |    |    |     |
| \$90,001 to \$100,000 | 30        | 6.1%    |   |    |    |    |    |     |
| \$100,001 or more     | 134       | 27.3%   |   |    |    |    |    |     |
| Don't know            | 26        | 5.3%    |   |    |    |    |    |     |

21

**What is the highest level of education attained by either of your parents?**

| Response                                      | Frequency | Percent | 0 | 20 | 40 | 60 | 80 | 100 |
|-----------------------------------------------|-----------|---------|---|----|----|----|----|-----|
| Did not finish high school                    | 15        | 3.0%    |   |    |    |    |    |     |
| High school diploma or equivalent (e.g., GED) | 24        | 4.9%    |   |    |    |    |    |     |
| Some college, but no degree                   | 33        | 6.7%    |   |    |    |    |    |     |
| Two year college degree or certificate        | 26        | 5.3%    |   |    |    |    |    |     |
| Four year college degree                      | 100       | 20.3%   |   |    |    |    |    |     |
| Post college graduate or professional school  | 292       | 59.3%   |   |    |    |    |    |     |
| Don't know                                    | 2         | 0.4%    |   |    |    |    |    |     |

22.

**What is the largest barrier to availability of health care in more developed countries?**

| Response                                                          | Frequency | Percent | 0 | 20 | 40 | 60 | 80 | 100 |
|-------------------------------------------------------------------|-----------|---------|---|----|----|----|----|-----|
| Insufficient numbers of domestic health care practitioners being  | 45        | 10.0%   |   |    |    |    |    |     |
| Insufficient and fluctuating numbers of foreign health care       | 9         | 2.0%    |   |    |    |    |    |     |
| Inadequate distribution of health care practitioners and services | 288       | 63.7%   |   |    |    |    |    |     |
| Inadequate reimbursement of health care practitioners and health  | 63        | 13.9%   |   |    |    |    |    |     |
| Don't know                                                        | 47        | 10.4%   |   |    |    |    |    |     |

23.

**In the United States, which geographic setting has seen the most rapid growth of health care practitioners over the past twenty years?**

| Response     | Frequency | Percent | 0 | 20 | 40 | 60 | 80 | 100 |
|--------------|-----------|---------|---|----|----|----|----|-----|
| Large cities | 174       | 38.5%   |   |    |    |    |    |     |
| Small cities | 46        | 10.2%   |   |    |    |    |    |     |
| Suburbs      | 145       | 32.1%   |   |    |    |    |    |     |
| Small towns  | 6         | 1.3%    |   |    |    |    |    |     |
| Rural areas  | 10        | 2.2%    |   |    |    |    |    |     |
| Don't know   | 71        | 15.7%   |   |    |    |    |    |     |

24.

**What percent of American families who file for personal bankruptcy do so for medical reasons?**

| Response   | Frequency | Percent | 0 | 20 | 40 | 60 | 80 | 100 |
|------------|-----------|---------|---|----|----|----|----|-----|
| 10%        | 34        | 7.6%    |   |    |    |    |    |     |
| 20%        | 81        | 18.0%   |   |    |    |    |    |     |
| 30%        | 113       | 25.2%   |   |    |    |    |    |     |
| 50%        | 82        | 18.3%   |   |    |    |    |    |     |
| Don't know | 139       | 31.0%   |   |    |    |    |    |     |

25.

**You suspect malignancy in one of your patients with chronic heartburn in your community clinic. You find out that they are recently uninsured and unable to pay for the endoscopy that you recommend. What is the most appropriate first step towards enhancing this patient's health care utilization?**

| Response                                                           | Frequency | Percent | 0 | 20 | 40 | 60 | 80 | 100 |
|--------------------------------------------------------------------|-----------|---------|---|----|----|----|----|-----|
| Request transfer of care to an academic center or public facility, | 46        | 10.2%   |   |    |    |    |    |     |
| Explore options within your health system to meet these needs      | 374       | 82.7%   |   |    |    |    |    |     |
| Understanding cost prohibitions, you treat conservatively with     | 9         | 2.0%    |   |    |    |    |    |     |
| Refer the patient to the emergency department                      | 2         | 0.4%    |   |    |    |    |    |     |
| Don't know                                                         | 21        | 4.6%    |   |    |    |    |    |     |

26.

**What is the primary health financing model in low income nations?**

| Response                         | Frequency | Percent | 0 | 20 | 40 | 60 | 80 | 100 |
|----------------------------------|-----------|---------|---|----|----|----|----|-----|
| Private health insurance         | 4         | 0.9%    |   |    |    |    |    |     |
| Government sponsored health plan | 199       | 44.2%   |   |    |    |    |    |     |
| Fee for service                  | 173       | 38.4%   |   |    |    |    |    |     |
| Managed care                     | 3         | 0.7%    |   |    |    |    |    |     |
| Employer-based health insurance  | 0         | 0.0%    |   |    |    |    |    |     |
| Don't know                       | 71        | 15.8%   |   |    |    |    |    |     |



## Learner's Needs Assessment

27.

**Which intervention by itself is least likely to improve health care utilization in low-income countries?**

| Response                                                              | Frequency | Percent | 0 | 20 | 40 | 60 | 80 | 100 |
|-----------------------------------------------------------------------|-----------|---------|---|----|----|----|----|-----|
| Equity funds to enable poorest patients to be exempt from health care | 46        | 10.2%   |   |    |    |    |    |     |
| Abolition of user fees for health care                                | 35        | 7.8%    |   |    |    |    |    |     |
| Establishment of new clinics in resource poor areas                   | 36        | 8.0%    |   |    |    |    |    |     |
| Cash payment for use of health care services                          | 229       | 50.9%   |   |    |    |    |    |     |
| Don't know                                                            | 104       | 23.1%   |   |    |    |    |    |     |

28.

**Which of the following is true regarding the uninsured population in the United States?**

| Response                                                            | Frequency | Percent | 0 | 20 | 40 | 60 | 80 | 100 |
|---------------------------------------------------------------------|-----------|---------|---|----|----|----|----|-----|
| Programs to universally insure children (e.g., SCHIP) do not affect | 7         | 1.6%    |   |    |    |    |    |     |
| There is no significant difference between insured and uninsured    | 5         | 1.1%    |   |    |    |    |    |     |
| 12% of Americans are currently uninsured                            | 42        | 9.4%    |   |    |    |    |    |     |
| Being uninsured is associated with increased all-cause mortality    | 232       | 51.8%   |   |    |    |    |    |     |
| The majority of the uninsured are also unemployed                   | 16        | 3.6%    |   |    |    |    |    |     |
| All of the above                                                    | 44        | 9.8%    |   |    |    |    |    |     |
| None of the above                                                   | 19        | 4.2%    |   |    |    |    |    |     |
| Don't know                                                          | 83        | 18.5%   |   |    |    |    |    |     |

29.

**Which of the following racial/ethnic groups has the lowest rates of health insurance?**

| Response                                  | Frequency | Percent | 0 | 20 | 40 | 60 | 80 | 100 |
|-------------------------------------------|-----------|---------|---|----|----|----|----|-----|
| White or Caucasian                        | 8         | 1.8%    |   |    |    |    |    |     |
| American Indian or Alaska Native          | 53        | 11.9%   |   |    |    |    |    |     |
| Asian                                     | 5         | 1.1%    |   |    |    |    |    |     |
| African American                          | 136       | 30.4%   |   |    |    |    |    |     |
| Hispanic or Latino                        | 173       | 38.7%   |   |    |    |    |    |     |
| Native Hawaiian or other Pacific Islander | 1         | 0.2%    |   |    |    |    |    |     |
| Don't know                                | 71        | 15.9%   |   |    |    |    |    |     |

30.

**You are contacted by the business office that your patient with diabetes, hypertension, and coronary artery disease has recently lost his health insurance. Which of the following is most likely regarding this patient?**

| Response                                                                  | Frequency | Percent | 0 | 20 | 40 | 60 | 80 | 100 |
|---------------------------------------------------------------------------|-----------|---------|---|----|----|----|----|-----|
| He will likely continue to be uninsured until he is eligible for Medicare | 138       | 30.8%   |   |    |    |    |    |     |
| If he were to regain health insurance a month later, his gap in           | 42        | 9.4%    |   |    |    |    |    |     |
| A health savings account is unlikely to improve his long-term health      | 24        | 5.4%    |   |    |    |    |    |     |
| A cost-sharing health insurance policy would improve his long-term        | 37        | 8.3%    |   |    |    |    |    |     |
| None of the above                                                         | 11        | 2.5%    |   |    |    |    |    |     |
| Don't know                                                                | 196       | 43.8%   |   |    |    |    |    |     |

31.

**Which health care delivery system is the primary provider of "safety net" coverage to medically underserved populations in the United States?**

| Response                                               | Frequency | Percent | 0 | 20 | 40 | 60 | 80 | 100 |
|--------------------------------------------------------|-----------|---------|---|----|----|----|----|-----|
| Public, non-profit, and teaching hospitals and clinics | 102       | 22.8%   |   |    |    |    |    |     |
| Emergency departments                                  | 261       | 58.3%   |   |    |    |    |    |     |
| Community health clinics                               | 22        | 4.9%    |   |    |    |    |    |     |
| Private physicians                                     | 0         | 0.0%    |   |    |    |    |    |     |
| Don't know                                             | 63        | 14.1%   |   |    |    |    |    |     |

32.

**Which of the following statements is most accurate regarding population-level life expectancies?**

| Response                                                             | Frequency | Percent | 0 | 20 | 40 | 60 | 80 | 100 |
|----------------------------------------------------------------------|-----------|---------|---|----|----|----|----|-----|
| The discrepancy in life expectancy between the countries with the    | 92        | 20.6%   |   |    |    |    |    |     |
| The difference in life expectancy between the best off and worst off | 41        | 9.2%    |   |    |    |    |    |     |
| Among more developed countries, the life expectancy correlates with  | 34        | 7.6%    |   |    |    |    |    |     |
| Life expectancy within countries is directly associated with         | 140       | 31.3%   |   |    |    |    |    |     |
| Don't know                                                           | 140       | 31.3%   |   |    |    |    |    |     |

33.

**You are about to see a patient with uncontrolled diabetes who has missed previous appointments and has been experiencing clinical decline. You read a social work note from one of his hospitalizations that describes significant financial stress at home. Which approach to this visit is most likely to positively affect health outcomes?**

| Response                                                                 | Frequency | Percent | 0 | 20 | 40 | 60 | 80 | 100 |
|--------------------------------------------------------------------------|-----------|---------|---|----|----|----|----|-----|
| Elicit the patient's perspective of diabetes, and assess vulnerabilities | 90        | 20.2%   |   |    |    |    |    |     |
| Add medications to enhance glycemic control                              | 5         | 1.1%    |   |    |    |    |    |     |
| Reiterate the medical (and financial) consequences of uncontrolled       | 17        | 3.8%    |   |    |    |    |    |     |
| Refer the patient to social services for financial assistance            | 286       | 64.1%   |   |    |    |    |    |     |
| Don't know                                                               | 48        | 10.8%   |   |    |    |    |    |     |

## Learner's Needs Assessment

34.

**You practice in a community with significant socioeconomic diversity. Half of your patients have a high-school education, while the other half has a graduate/professional school education. What is a likely difference between these groups?**

| Response                                                                 | Frequency | Percent | 0 | 20 | 40 | 60 | 80 | 100 |
|--------------------------------------------------------------------------|-----------|---------|---|----|----|----|----|-----|
| The higher-educated group is less likely to exercise regularly           | 5         | 1.1%    |   |    |    |    |    |     |
| The higher-educated group is less likely to report a superior quality of | 13        | 2.9%    |   |    |    |    |    |     |
| The higher-educated group is more likely to smoke                        | 8         | 1.8%    |   |    |    |    |    |     |
| The higher-educated group is likely to live longer                       | 291       | 65.0%   |   |    |    |    |    |     |
| All of the above                                                         | 14        | 3.1%    |   |    |    |    |    |     |
| None of the above                                                        | 45        | 10.0%   |   |    |    |    |    |     |
| Don't know                                                               | 72        | 16.1%   |   |    |    |    |    |     |

35.

**Which group has the lowest health literacy and associated discrepancies in health outcomes?**

| Response                      | Frequency | Percent | 0 | 20 | 40 | 60 | 80 | 100 |
|-------------------------------|-----------|---------|---|----|----|----|----|-----|
| Young adults (18 to 39)       | 115       | 25.6%   |   |    |    |    |    |     |
| Middle-aged adults (40 to 64) | 67        | 14.9%   |   |    |    |    |    |     |
| Elderly (65 or older)         | 186       | 41.3%   |   |    |    |    |    |     |
| Don't know                    | 82        | 18.2%   |   |    |    |    |    |     |

36.

**The groundbreaking Whitehall studies examined health outcomes as they related to which measure of socioeconomic position?**

| Response           | Frequency | Percent | 0 | 20 | 40 | 60 | 80 | 100 |
|--------------------|-----------|---------|---|----|----|----|----|-----|
| Income             | 10        | 2.2%    |   |    |    |    |    |     |
| Educational level  | 31        | 6.9%    |   |    |    |    |    |     |
| Occupational class | 19        | 4.2%    |   |    |    |    |    |     |
| Social capital     | 8         | 1.8%    |   |    |    |    |    |     |
| All of the above   | 54        | 12.0%   |   |    |    |    |    |     |
| None of the above  | 1         | 0.2%    |   |    |    |    |    |     |
| Don't know         | 326       | 72.6%   |   |    |    |    |    |     |

37.

**When taking a social history, you find out that your patient works on the production line at a local dairy processing plant. Which of the following is most likely to be correct?**

| Response                                                                | Frequency | Percent | 0 | 20 | 40 | 60 | 80 | 100 |
|-------------------------------------------------------------------------|-----------|---------|---|----|----|----|----|-----|
| Your patient is less likely to smoke than his plant manager             | 6         | 1.3%    |   |    |    |    |    |     |
| All else being equal, your patient's all-cause mortality risk is higher | 303       | 67.3%   |   |    |    |    |    |     |
| Your patient's job is less physiologically and psychologically          | 23        | 5.1%    |   |    |    |    |    |     |
| Your patient is less likely to be exposed to physical, chemical, and    | 10        | 2.2%    |   |    |    |    |    |     |
| Don't know                                                              | 108       | 24.0%   |   |    |    |    |    |     |

38.

**Which of the following work environments is most likely to improve health outcomes among employees?**

| Response                                   | Frequency | Percent | 0 | 20 | 40 | 60 | 80 | 100 |
|--------------------------------------------|-----------|---------|---|----|----|----|----|-----|
| Low demand work load                       | 48        | 10.7%   |   |    |    |    |    |     |
| High demand work load                      | 12        | 2.7%    |   |    |    |    |    |     |
| High control over work environment         | 315       | 70.0%   |   |    |    |    |    |     |
| High effort at work with low reward system | 2         | 0.4%    |   |    |    |    |    |     |
| Don't know                                 | 73        | 16.2%   |   |    |    |    |    |     |

39.

**Your patient is being discharged after treatment of a myocardial infarction. You recall that social support (emotional and informational support from family, friends, and colleagues) is independently associated with improved post-MI outcomes. Which patient group is most likely to enjoy these benefits of social support?**

| Response           | Frequency | Percent | 0 | 20 | 40 | 60 | 80 | 100 |
|--------------------|-----------|---------|---|----|----|----|----|-----|
| High-income male   | 153       | 34.0%   |   |    |    |    |    |     |
| Low-income male    | 36        | 8.0%    |   |    |    |    |    |     |
| High-income female | 136       | 30.2%   |   |    |    |    |    |     |
| Low-income female  | 47        | 10.4%   |   |    |    |    |    |     |
| Don't know         | 78        | 17.3%   |   |    |    |    |    |     |

40.

**Which of the following is true regarding environmental health?**

| Response                                                            | Frequency | Percent | 0 | 20 | 40 | 60 | 80 | 100 |
|---------------------------------------------------------------------|-----------|---------|---|----|----|----|----|-----|
| In the developing world, the most quantifiable environmental health | 117       | 26.0%   |   |    |    |    |    |     |
| Socioeconomic position is not associated with environmental risk    | 5         | 1.1%    |   |    |    |    |    |     |
| Outdoor air pollution affects all socioeconomic groups equally      | 45        | 10.0%   |   |    |    |    |    |     |
| The "precautionary principle" states that all new chemical and      | 68        | 15.1%   |   |    |    |    |    |     |
| All of the above                                                    | 38        | 8.4%    |   |    |    |    |    |     |
| None of the above                                                   | 33        | 7.3%    |   |    |    |    |    |     |
| Don't know                                                          | 144       | 32.0%   |   |    |    |    |    |     |

## Learner's Needs Assessment

**41. You are seeing a 29 year-old patient in your inner city clinic with obesity, impaired glucose tolerance, hyperlipidemia, and hypertension. Which realm of environmental health is likely to be contributing most to his health problems?**

| Response                                                         | Frequency | Percent | 0 | 20 | 40 | 60 | 80 | 100 |
|------------------------------------------------------------------|-----------|---------|---|----|----|----|----|-----|
| Air pollution                                                    | 34        | 7.6%    |   |    |    |    |    |     |
| Water pollution                                                  | 6         | 1.3%    |   |    |    |    |    |     |
| The built environment (e.g., housing, schools, workplace, green) | 223       | 50.0%   |   |    |    |    |    |     |
| Hazardous waste                                                  | 4         | 0.9%    |   |    |    |    |    |     |
| None of the above                                                | 109       | 24.4%   |   |    |    |    |    |     |
| Don't know                                                       | 70        | 15.7%   |   |    |    |    |    |     |

**42. Which of the following is true regarding health care disparities between African Americans and Whites in the United States?**

| Response                                                              | Frequency | Percent | 0 | 20 | 40 | 60 | 80 | 100 |
|-----------------------------------------------------------------------|-----------|---------|---|----|----|----|----|-----|
| There is no significant difference in referral rates for cardiac      | 5         | 1.1%    |   |    |    |    |    |     |
| African Americans receive more analgesia for cancer pain than         | 1         | 0.2%    |   |    |    |    |    |     |
| African Americans with end-stage kidney disease are less likely to be | 251       | 56.0%   |   |    |    |    |    |     |
| Quality of hospital care for treatment of pneumonia and congestive    | 19        | 4.2%    |   |    |    |    |    |     |
| African Americans receive more curative surgery than Whites for non   | 0         | 0.0%    |   |    |    |    |    |     |
| All of the above                                                      | 12        | 2.7%    |   |    |    |    |    |     |
| None of the above                                                     | 52        | 11.6%   |   |    |    |    |    |     |
| Don't know                                                            | 108       | 24.1%   |   |    |    |    |    |     |

**43. Which of the following racial/ethnic groups has the lowest life expectancy among the U.S. population?**

| Response                                  | Frequency | Percent | 0 | 20 | 40 | 60 | 80 | 100 |
|-------------------------------------------|-----------|---------|---|----|----|----|----|-----|
| White or Caucasian                        | 3         | 0.7%    |   |    |    |    |    |     |
| American Indian or Alaska Native          | 130       | 29.0%   |   |    |    |    |    |     |
| Asian                                     | 2         | 0.4%    |   |    |    |    |    |     |
| African American                          | 201       | 44.8%   |   |    |    |    |    |     |
| Hispanic or Latino                        | 36        | 8.0%    |   |    |    |    |    |     |
| Native Hawaiian or other Pacific Islander | 12        | 2.7%    |   |    |    |    |    |     |
| Don't know                                | 65        | 14.5%   |   |    |    |    |    |     |

**44. In their 2002 publication, Unequal Treatment, which of the following did the Institute of Medicine conclude were primary root-causes for racial and ethnic healthcare disparities in the United States?**

| Response                                                           | Frequency | Percent | 0 | 20 | 40 | 60 | 80 | 100 |
|--------------------------------------------------------------------|-----------|---------|---|----|----|----|----|-----|
| Healthcare disparities can largely be explained by the tendency of | 2         | 0.4%    |   |    |    |    |    |     |
| Healthcare disparities can largely be explained by the increased   | 16        | 3.6%    |   |    |    |    |    |     |
| Healthcare disparities are inevitable realities of the health care | 21        | 4.7%    |   |    |    |    |    |     |
| Healthcare disparities can largely be explained through bias,      | 173       | 38.7%   |   |    |    |    |    |     |
| All of the above                                                   | 38        | 8.5%    |   |    |    |    |    |     |
| None of the above                                                  | 27        | 6.0%    |   |    |    |    |    |     |
| Don't know                                                         | 170       | 38.0%   |   |    |    |    |    |     |

**45. You practice in an ethnically diverse community, and you note that African Americans are 28% more likely to die from cardiovascular disease, but they are far less likely to be referred for cardiac catheterizations. Which mechanism is likely to be the strongest contributor to this health care disparity?**

| Response                                                       | Frequency | Percent | 0 | 20 | 40 | 60 | 80 | 100 |
|----------------------------------------------------------------|-----------|---------|---|----|----|----|----|-----|
| Differences in disease severity between African Americans and  | 3         | 0.7%    |   |    |    |    |    |     |
| Geographic variations in type of hospital/health care facility | 32        | 7.1%    |   |    |    |    |    |     |
| Higher rates of refusal of care among African Americans        | 9         | 2.0%    |   |    |    |    |    |     |
| Social isolation, segregation, and financial vulnerability     | 263       | 58.7%   |   |    |    |    |    |     |
| Overuse of services by Whites                                  | 8         | 1.8%    |   |    |    |    |    |     |
| Increased co-morbidities among African Americans               | 33        | 7.4%    |   |    |    |    |    |     |
| Don't know                                                     | 100       | 22.3%   |   |    |    |    |    |     |

**46. According to major studies addressing this topic, which of the following is true regarding minority health care providers?**

| Response                                                            | Frequency | Percent | 0 | 20 | 40 | 60 | 80 | 100 |
|---------------------------------------------------------------------|-----------|---------|---|----|----|----|----|-----|
| Individuals from minority groups prefer to obtain health care in an | 209       | 46.8%   |   |    |    |    |    |     |
| Minority health care providers are less likely to practice in       | 28        | 6.3%    |   |    |    |    |    |     |
| Minorities are less likely to take part in a research study when    | 14        | 3.1%    |   |    |    |    |    |     |
| Minorities are represented at population levels among physicians    | 8         | 1.8%    |   |    |    |    |    |     |
| All of the above                                                    | 18        | 4.0%    |   |    |    |    |    |     |
| None of the above                                                   | 29        | 6.5%    |   |    |    |    |    |     |
| Don't know                                                          | 141       | 31.5%   |   |    |    |    |    |     |

## Learner's Needs Assessment

**47. During a first visit with a black patient, you notice that he is somewhat reluctant to pursue recommended testing. What is most likely regarding this patient's level of trust of the medical system?**

| Response                                                                | Frequency | Percent | 0 | 20 | 40 | 60 | 80 | 100 |
|-------------------------------------------------------------------------|-----------|---------|---|----|----|----|----|-----|
| All else being equal, he is less likely to trust the health care system | 195       | 43.4%   |   |    |    |    |    |     |
| He represents an American populace that is reporting increased trust    | 13        | 2.9%    |   |    |    |    |    |     |
| He is likely concerned that he or a family member will be treated       | 131       | 29.2%   |   |    |    |    |    |     |
| He is likely to cite the Tuskegee syphilis study as the primary reason  | 9         | 2.0%    |   |    |    |    |    |     |
| Don't know                                                              | 101       | 22.5%   |   |    |    |    |    |     |

**48. One of your patients, a Spanish-speaking immigrant, did not show up for his appointment with you. Which of the following practices is most likely to positively influence this patient's health care utilization?**

| Response                                                               | Frequency | Percent | 0 | 20 | 40 | 60 | 80 | 100 |
|------------------------------------------------------------------------|-----------|---------|---|----|----|----|----|-----|
| Improve the services offered in specialty care practice to enhance     | 15        | 3.4%    |   |    |    |    |    |     |
| Hire trained medical interpreters to enhance the linguistic competency | 198       | 44.3%   |   |    |    |    |    |     |
| Conduct an afternoon workshop on cultural competency for health        | 7         | 1.6%    |   |    |    |    |    |     |
| Educate the health system staff on health-seeking behaviors of         | 14        | 3.1%    |   |    |    |    |    |     |
| All of the above                                                       | 136       | 30.4%   |   |    |    |    |    |     |
| None of the above                                                      | 5         | 1.1%    |   |    |    |    |    |     |
| Don't know                                                             | 72        | 16.1%   |   |    |    |    |    |     |

**49. You practice in a diverse community where half of the population speaks little English. What is likely to be true regarding the health care of your non-English-speaking patients?**

| Response                                                                 | Frequency | Percent | 0 | 20 | 40 | 60 | 80 | 100 |
|--------------------------------------------------------------------------|-----------|---------|---|----|----|----|----|-----|
| They will experience inferior quality of care                            | 203       | 45.3%   |   |    |    |    |    |     |
| They are more likely to seek care                                        | 10        | 2.2%    |   |    |    |    |    |     |
| They are less likely to be admitted to the hospital from the emergency   | 39        | 8.7%    |   |    |    |    |    |     |
| They are more likely to be satisfied with their health care provider and | 32        | 7.1%    |   |    |    |    |    |     |
| All of the above                                                         | 20        | 4.5%    |   |    |    |    |    |     |
| None of the above                                                        | 38        | 8.5%    |   |    |    |    |    |     |
| Don't know                                                               | 106       | 23.7%   |   |    |    |    |    |     |

**50. Which of the following is an example of a health inequity?**

| Response                                                            | Frequency | Percent | 0 | 20 | 40 | 60 | 80 | 100 |
|---------------------------------------------------------------------|-----------|---------|---|----|----|----|----|-----|
| Increased prevalence of sickle cell disease among African Americans | 5         | 1.1%    |   |    |    |    |    |     |
| Increased prevalence of breast cancer among women compared to       | 1         | 0.2%    |   |    |    |    |    |     |
| Increased prevalence of myocardial infarction among lower income    | 331       | 74.0%   |   |    |    |    |    |     |
| Increased prevalence of lung cancer in smokers compared to          | 3         | 0.7%    |   |    |    |    |    |     |
| All of above                                                        | 20        | 4.5%    |   |    |    |    |    |     |
| None of the above                                                   | 38        | 8.5%    |   |    |    |    |    |     |
| Don't know                                                          | 49        | 11.0%   |   |    |    |    |    |     |

**51. As a physician, you feel an obligation to promote initiatives that would positively influence the health of your community. Addressing which set of issues would likely be the strongest contribution to health equity?**

| Response                                                        | Frequency | Percent | 0 | 20 | 40 | 60 | 80 | 100 |
|-----------------------------------------------------------------|-----------|---------|---|----|----|----|----|-----|
| Achieving universal access to health care                       | 157       | 35.3%   |   |    |    |    |    |     |
| Eliminating racial stereotyping among health care providers and | 55        | 12.4%   |   |    |    |    |    |     |
| Achieving more equal access to healthy food, housing, and       | 160       | 36.0%   |   |    |    |    |    |     |
| Optimizing patient safety in health care systems                | 12        | 2.7%    |   |    |    |    |    |     |
| Don't know                                                      | 61        | 13.7%   |   |    |    |    |    |     |
